# Supplementary material
Source: publisher figshare collection journal article supplement (https://acs.figshare.com/ndownloader/files/3947239)
Supplement: Supplementary file 1 [file 3947239]

# Supporting Information

## Adsorption Characteristics of Metal Organic Frameworks containing Coordinatively Unsaturated Metal Sites: Effect of Metal Cations and Adsorbate Properties

*Prashant Mishra, Satyannarayana Edubilli, Bishnupada Mandal, Sasidhar Gumma\**

Department of Chemical Engineering, Indian Institute of Technology Guwahati  
Guwahati - 781039, Assam, India.

### Contents

**Page S2.** Physical properties of gases.

**Page S3-S4.** Synthesis.

**Page S5-S6.** Material characterization.

**Page S7-S24.** Adsorption isotherms.

**Page S25-S27.** Fit parameters.

**Page S28.** Adsorption Enthalpies.

**Page S29-S30.** IAST predictions.

**Page S31.** References.

**Table S1.** Physical properties of studied gases.

| gas                           | molecular<br>Weight<br>(g mol <sup>-1</sup> ) | kinetic<br>diameter<br>(Å) | polarizability<br>(×10 <sup>-25</sup> cm <sup>3</sup> ) | quadrupole<br>moment<br>(×10 <sup>-40</sup> C*m <sup>2</sup> ) | dipole moment<br>(×10 <sup>18</sup> esu.cm) |
|-------------------------------|-----------------------------------------------|----------------------------|---------------------------------------------------------|----------------------------------------------------------------|---------------------------------------------|
| CO <sub>2</sub>               | 44                                            | 3.3                        | 26.3                                                    | 14.3                                                           | 0.0                                         |
| CO                            | 28                                            | 3.76                       | 19.5                                                    | 2.5                                                            | 0.112                                       |
| CH <sub>4</sub>               | 16                                            | 3.8                        | 26.0                                                    | 0.0                                                            | 0.0                                         |
| C <sub>2</sub> H <sub>6</sub> | 30                                            | 4.4                        | 44.7                                                    | 0.65                                                           | 0.0                                         |
| N <sub>2</sub>                | 28                                            | 3.64                       | 17.6                                                    | 1.52                                                           | 0.0                                         |
| Ar                            | 40                                            | 3.4                        | 16.6                                                    | 0.0                                                            | 0.0                                         |

## Synthesis

**Mg/DOBDC.** The synthesis was carried out as per procedure suggested by Caskey et al.<sup>1</sup> A solid mixture of 2,5-dihydroxy terephthalic acid (0.888 g, 4.472 mmol, Sigma aldrich) and  $\text{Mg}(\text{NO}_3)_2 \cdot 6\text{H}_2\text{O}$  (3.795 g, 14.8 mmol, Merck) was added into a 15:1:1 (v/v/v) mixture of DMF/ethanol/water (400 mL). The suspension was sonicated for about 5 minutes to make it homogeneous. Then the suspension was equally distributed in twenty seven 30-mL polypropylene vials. These vials were capped tightly and kept in an oven at 398 K for 20 hours. Samples were then cooled to RT followed by decantation of mother liquid from obtained yellowish crystals. Methanol of similar quantity as of mother liquid (~15 mL per vials) was added. Then suspension was collected in one 500-mL polypropylene vial. After every 12 hours, methanol was decanted and replaced with fresh one for two days to get as-synthesized Mg/DOBDC crystals. These crystals were dried and stored in vacuum.

**Co/DOBDC.** As per procedure suggested elsewhere<sup>1</sup> 2,5-dihydroxy terephthalic acid (0.482 g, 2.43 mmol, Sigma aldrich),  $\text{Co}(\text{NO}_3)_2 \cdot 6\text{H}_2\text{O}$  (2.377 g, 8.67 mmol, Merck) and a 1:1:1 (v/v/v) mixture of DMF–ethanol–water (200 mL) were mixed in a 500 ml polypropylene vial. Sonication of the suspension was done for about 5 minutes to make it homogeneous. Then vial was capped tightly and kept in an oven at 373 K for 24 hours. Sample was then cooled to RT followed by decantation of mother liquid from obtained crystals. Methanol of similar quantity as of mother liquid (~200 mL) was added. After every 12 hours, methanol was decanted and replaced with fresh one for two days to get as-synthesized Co/DOBDC crystals of violet color. These crystals were dried and stored in vacuum.

**Ni/DOBDC.** The synthesis was carried out as per procedure suggested by Caskey et al.<sup>1</sup> A solid mixture of 2,5-dihydroxy terephthalic acid (0.478 g, 2.41 mmol, Sigma aldrich) and  $\text{Ni}(\text{NO}_3)_2 \cdot 6\text{H}_2\text{O}$  (2.378 g, 8.178 mmol, Merck) were added to a 1:1:1 (v/v/v) mixture of DMF–ethanol–water (200 mL) in a 500 ml polypropylene vial. Sonication of the suspension was done for about 5 minutes to make it homogeneous. Then vial was capped tightly and kept in an oven at 373 K for 24 hours. Sample was then cooled to RT followed by decantation of mother liquid from obtained crystals. Methanol of similar quantity as of mother liquid (~200 mL) was added. After every 12 hours, methanol was decanted and replaced with fresh one for two days to get as-synthesized Ni/DOBDC crystals of yellowish green color. These crystals were dried and stored in vacuum.

**Mn/DOBDC.** Synthesis procedure was slightly modified from that reported in literature.<sup>2</sup> A solid mixture of 2,5-dihydroxy terephthalic acid (0.888 g, 4.472 mmol, Sigma aldrich) and  $\text{Mn}(\text{NO}_3)_2 \cdot 4\text{H}_2\text{O}$  (3.715 g, 14.8 mmol, Merck) was added into a 15:1:1 (v/v/v) mixture of DMF/ethanol/water (400 mL). The suspension was sonicated for about 5 minutes to make it homogeneous. Then the suspension was equally distributed in twenty seven 30-mL polypropylene vials. These vials were capped tightly and kept in an oven at 404 K for 24 hours. Samples were then cooled to RT followed by decantation of mother liquid from obtained brownish crystals. Methanol of similar quantity as of mother liquid (~15 mL per vials) was added. Then suspension was collected in one 500-mL polypropylene vial. After every 12 hours, methanol was decanted and replaced with fresh one for two days to get as-synthesized Mn/DOBDC crystals. These crystals were dried and stored in vacuum.

## Material Characterization

**Thermogravimetric analysis (TGA).** TGA of all M/DOBDC samples (M = Mg, Mn, Co and Ni) was performed in a thermogravimetric analyzer (Mettler TOLEDO, model no. TGA/SDTA 851<sup>o</sup>). The temperature was ramped from 298 to 873 K with a heating rate of 5 K min<sup>-1</sup>, and the measurements were carried out under a nitrogen atmosphere. The results are given in Figure S1. There are total three weight loss steps for each sample. First weight loss step up to 377 K is relatively rapid, and corresponds to removal solvent (methanol) and moisture. Second slack weight loss is due to detachment of coordinatively bonded water molecules; thus creating coordinatively unsaturated metal sites in the frameworks.<sup>3</sup> Start of the final weight loss step corresponding to the decomposition of the sample and collapse of the framework structure varies for different sample; it started at the highest temperature (~700 K) for Mg/DOBDC and at lowest temperature (~560 K) for Co/DOBDC.

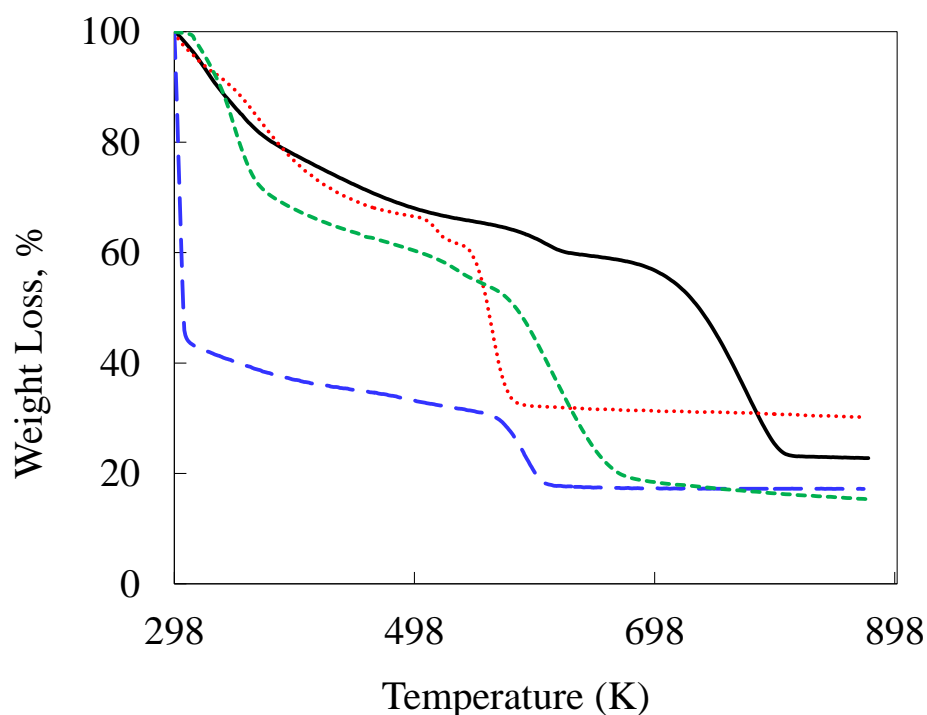

**Figure S1.** TGA analysis of Mg/DOBDC (—), Mn/DOBDC (---), Co/DOBDC (···) and Ni/DOBDC (— ·) at heating rate of 5 K min<sup>-1</sup> under flow of N<sub>2</sub>.

**X-ray diffraction (XRD) analysis.** XRD analysis of synthesis M/DOBDC samples was carried on a Bruker A8 advance instrument operating at 40 kV and 40 mA using Cu K $\alpha$  ( $\lambda = 1.5406 \text{ \AA}$ ) radiation. The powder X-ray diffraction (XRD) patterns (Figure S2) are similar to the XRD pattern reported for these materials in the literature.<sup>2</sup>

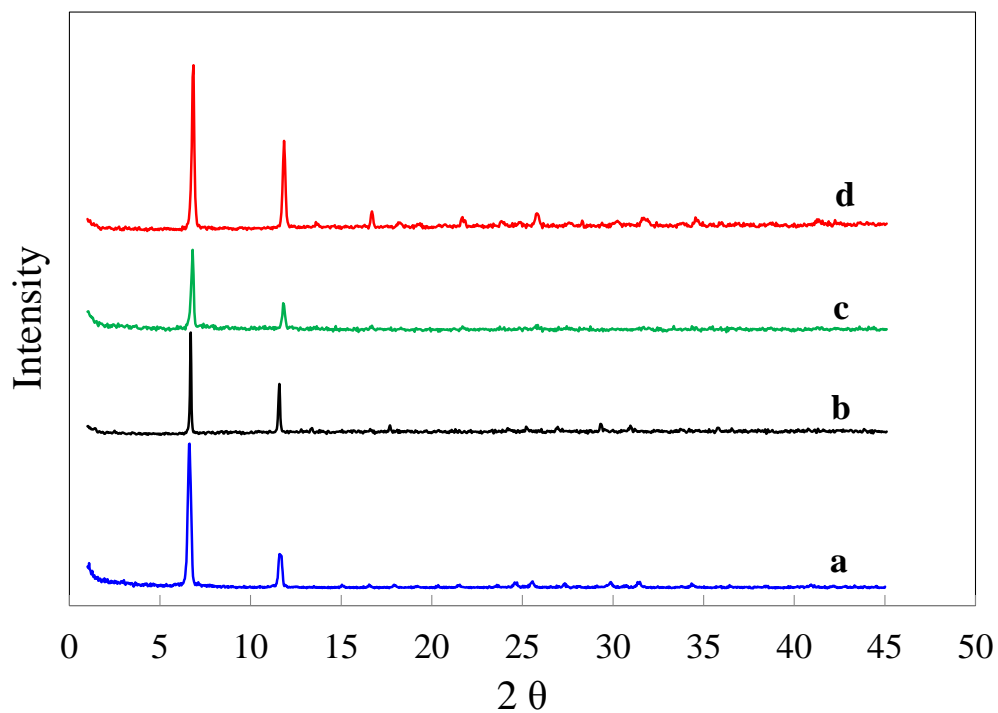

**Figure S2.** X-ray diffractogram of (a) Mg/DOBDC, (b) Mn/DOBDC, (c) Co/DOBDC and (d) Ni/DOBDC.

## Adsorption isotherms-

### Multi-temperature adsorption isotherms of different adsorbates

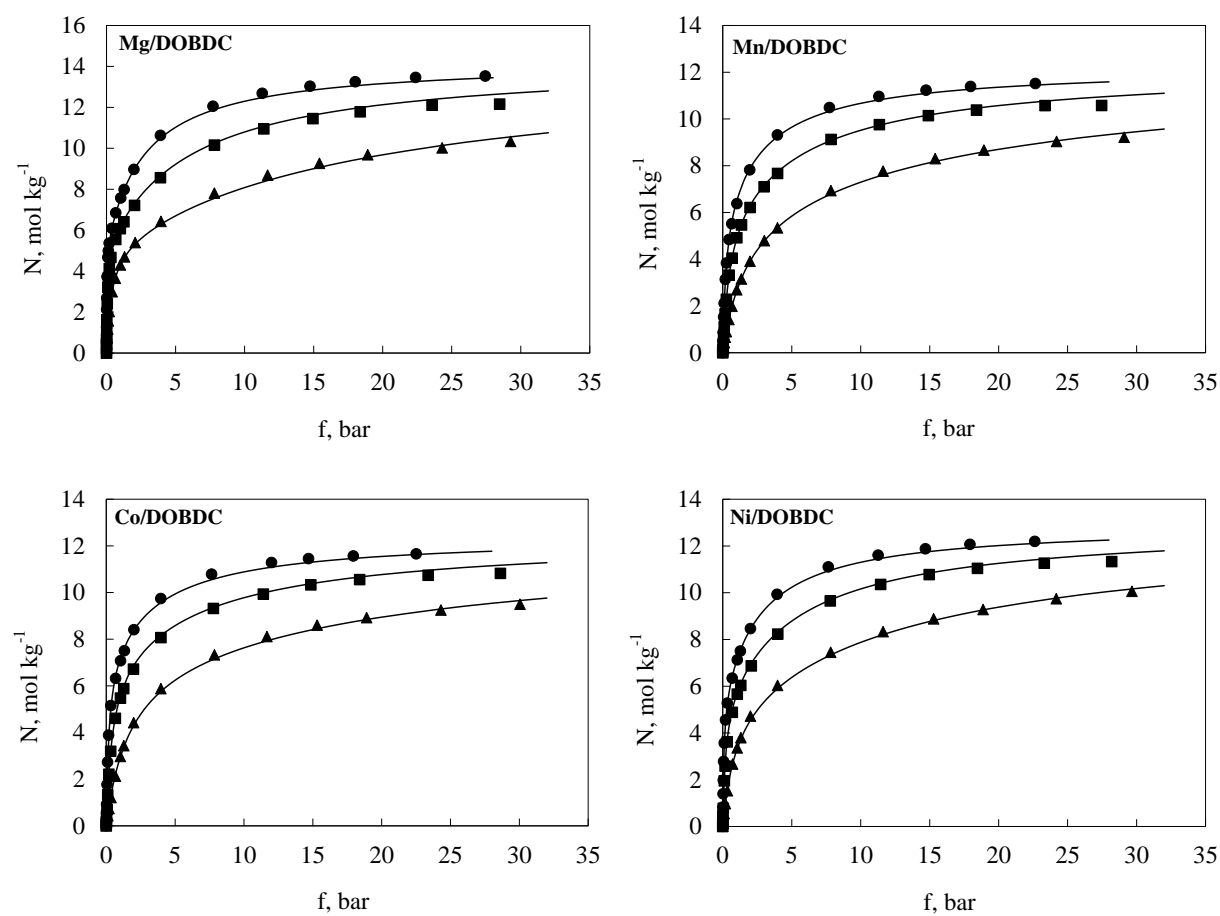

**Figure S3.** CO<sub>2</sub> isotherms. Symbols are experimental data at 294 K (●), 315 K (■) and 352 K (▲); lines are fits obtained using DSL isotherm parameters from Tables S2.

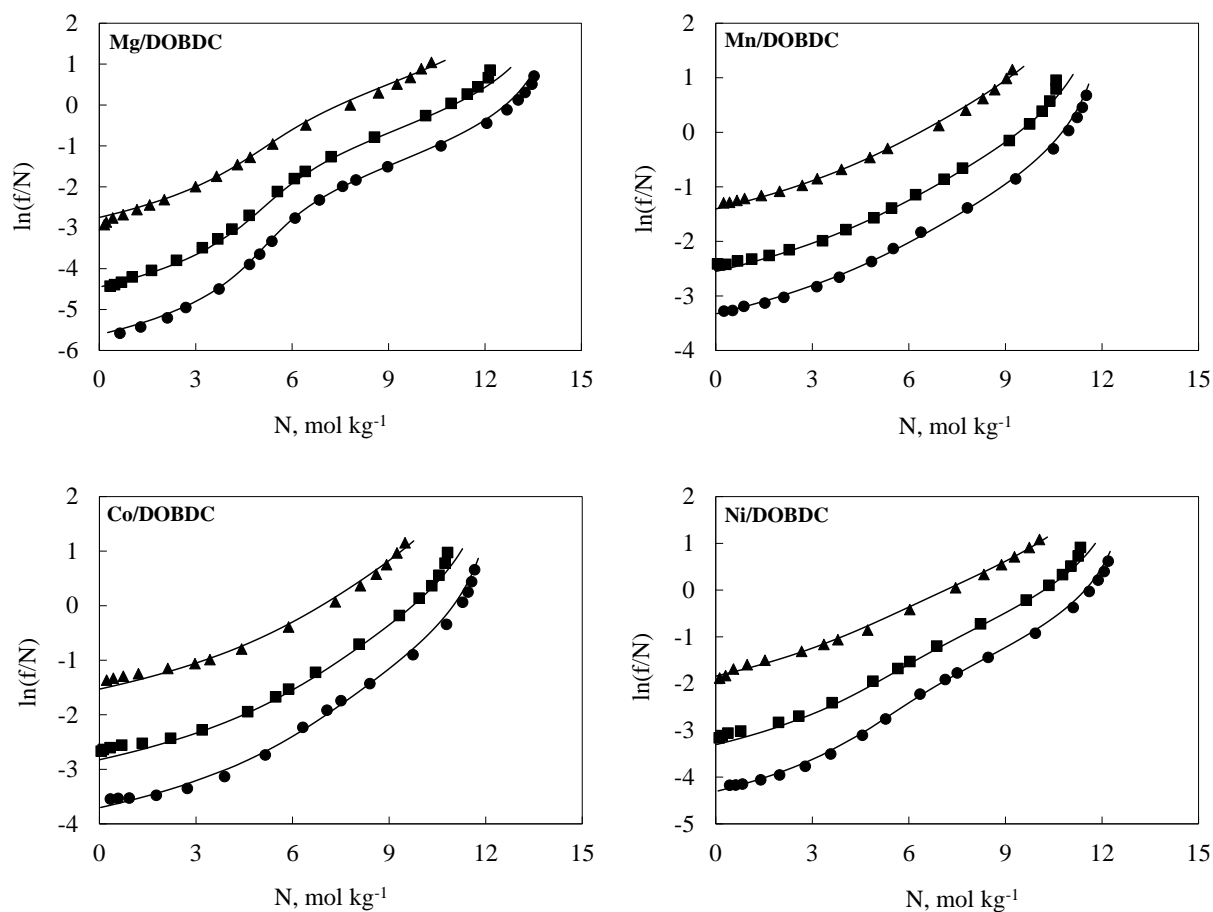

**Figure S4.** CO<sub>2</sub> isotherms in virial domain. Symbols are experimental data at 294 K (●), 315 K (■) and 352 K (▲); lines are fits obtained using DSL isotherm parameters from Tables S2.

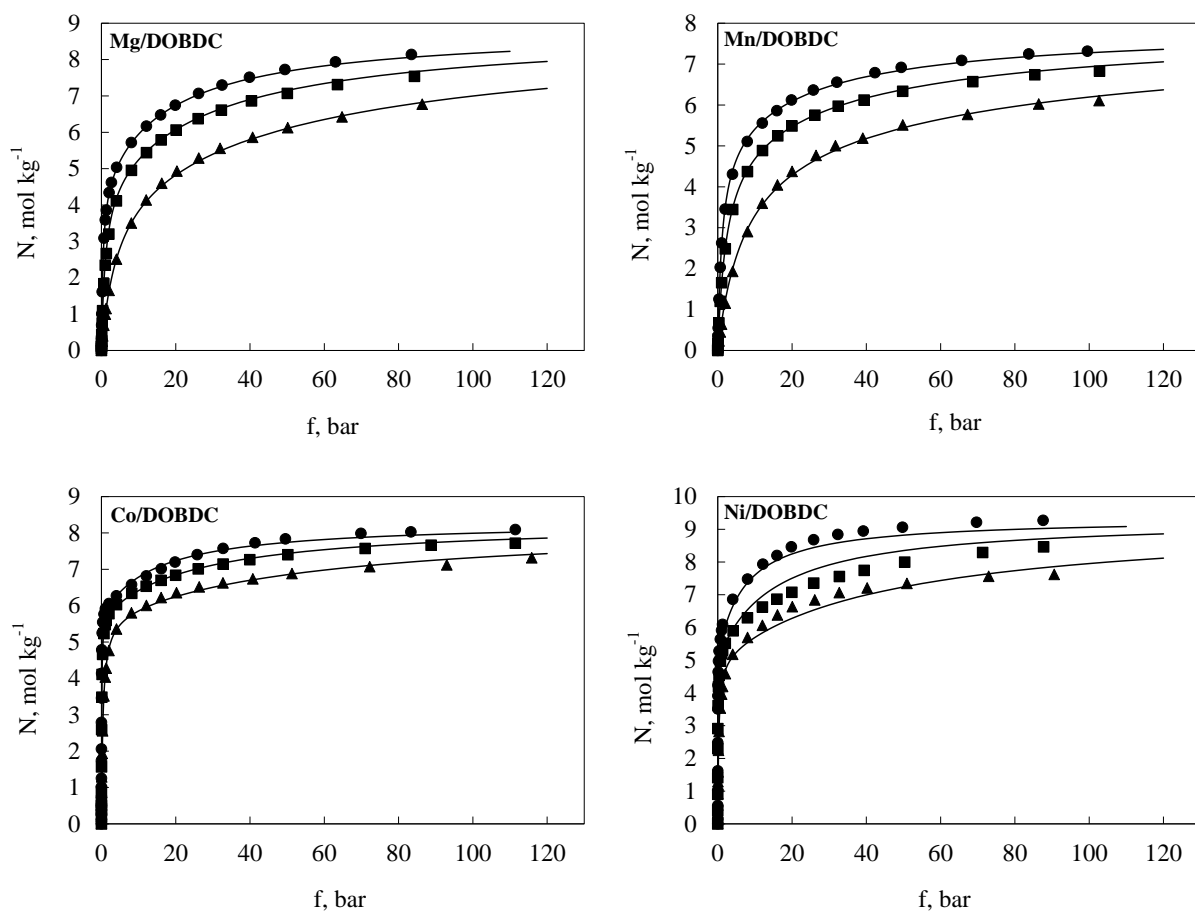

**Figure S5.** CO isotherms. Symbols are experimental data at 294 K (●), 315 K (■) and 352 K (▲); lines are fits obtained using DSL isotherm parameters from Tables S3.

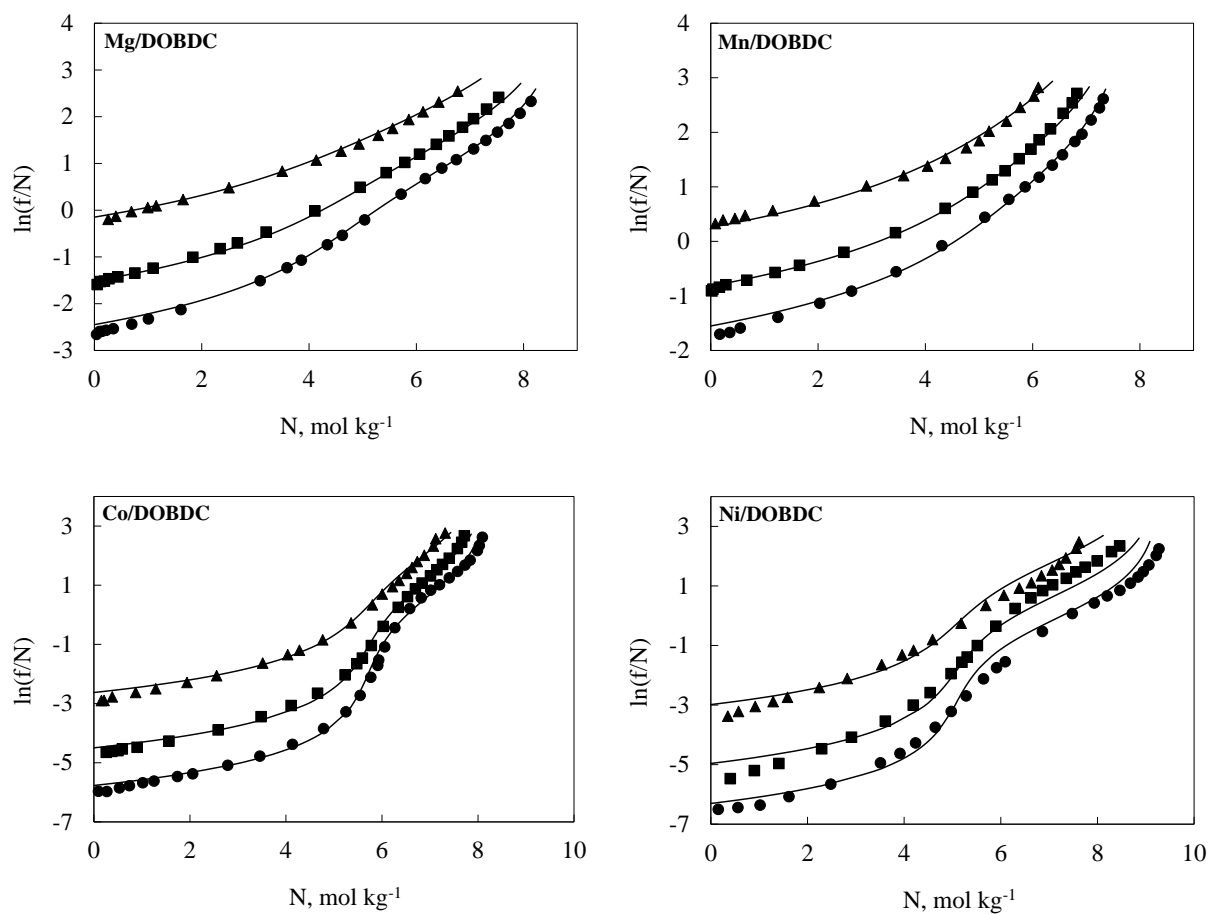

**Figure S6.** CO isotherms in virial domain. Symbols are experimental data at 294 K (●), 315 K (■) and 352 K (▲); lines are fits obtained using DSL isotherm parameters from Tables S3.

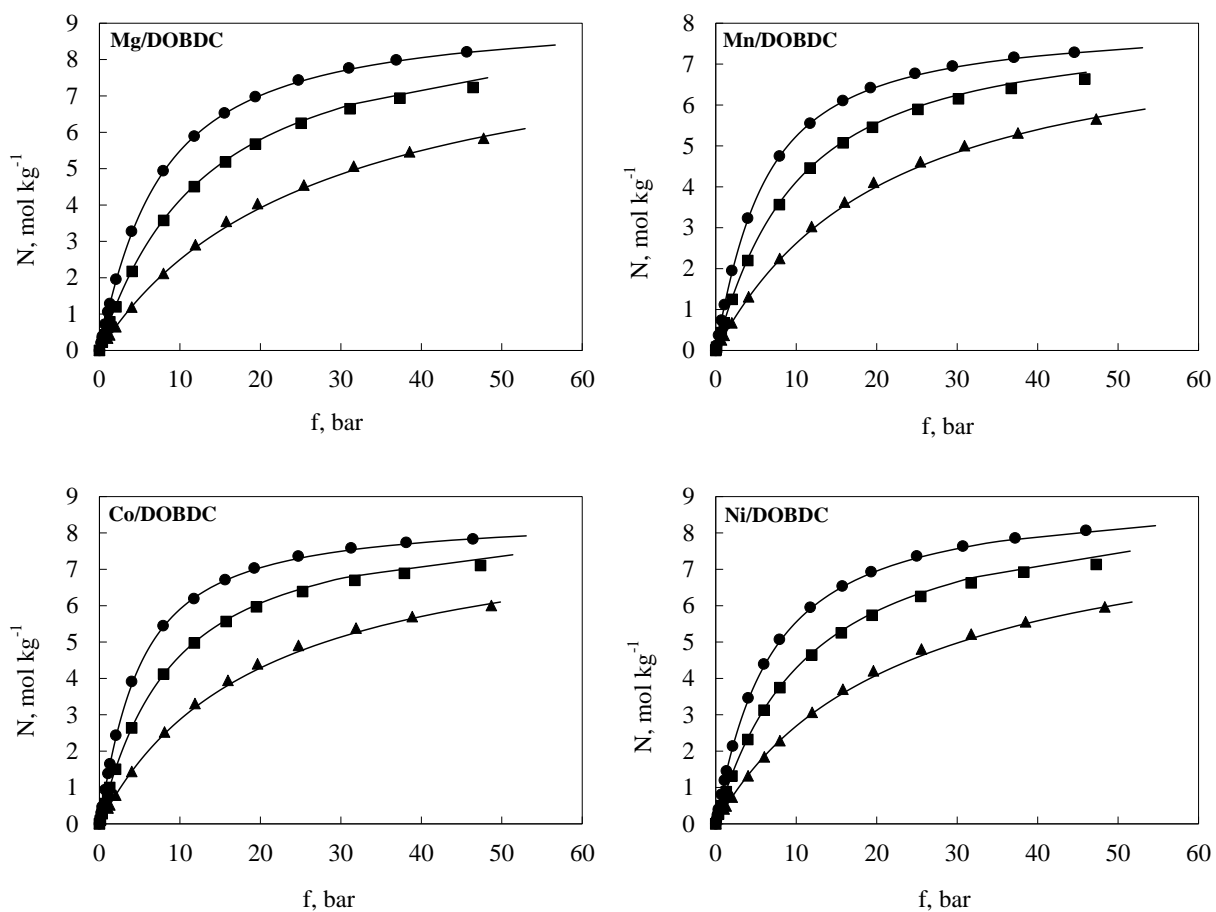

**Figure S7.** CH<sub>4</sub> isotherms. Symbols are experimental data at 294 K (●), 315 K (■) and 352 K (▲); lines are fits obtained using Langmuir-virial isotherm parameters from Tables S4.

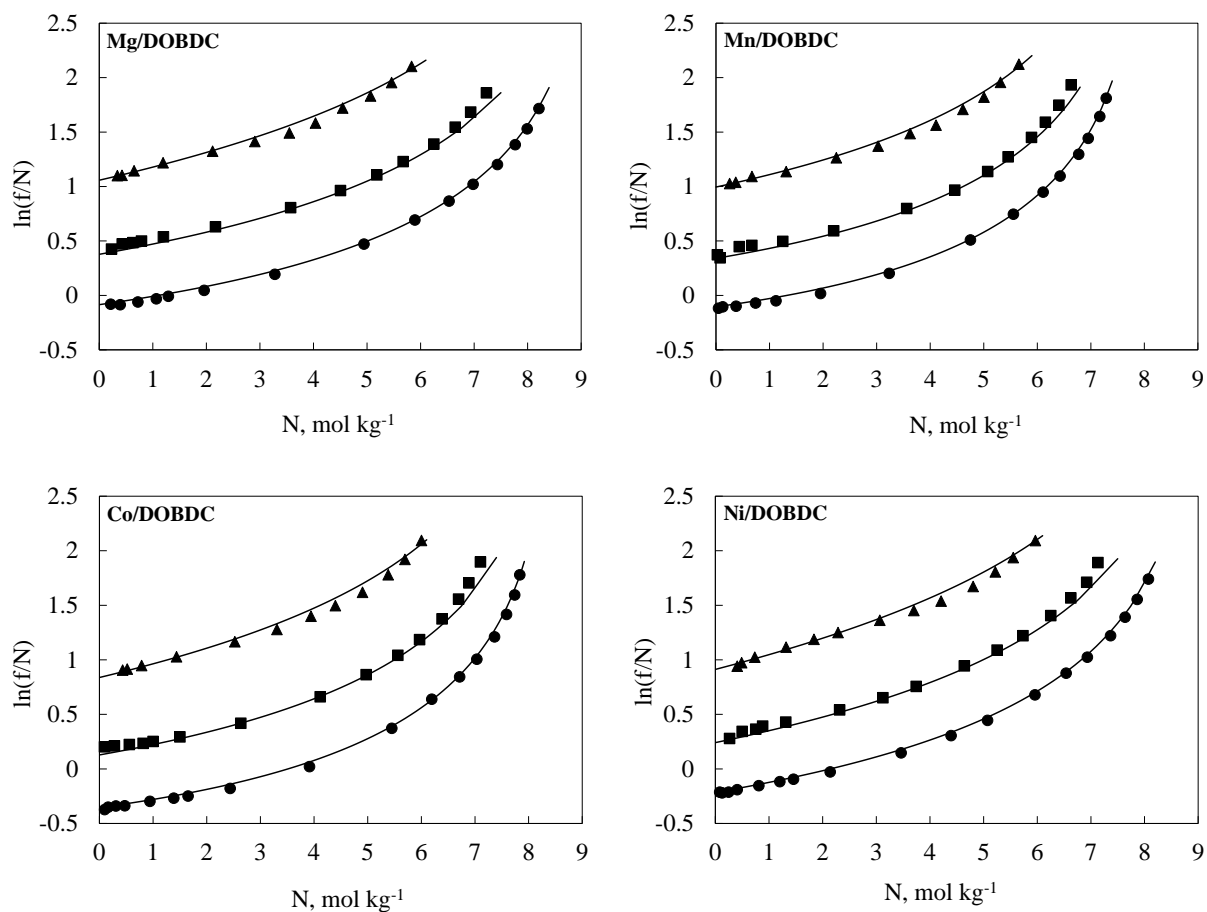

**Figure S8.**  $\text{CH}_4$  isotherms in virial domain. Symbols are experimental data at 294 K (●), 315 K (■) and 352 K (▲); lines are fits obtained using Langmuir-virial isotherm parameters from Tables S4.

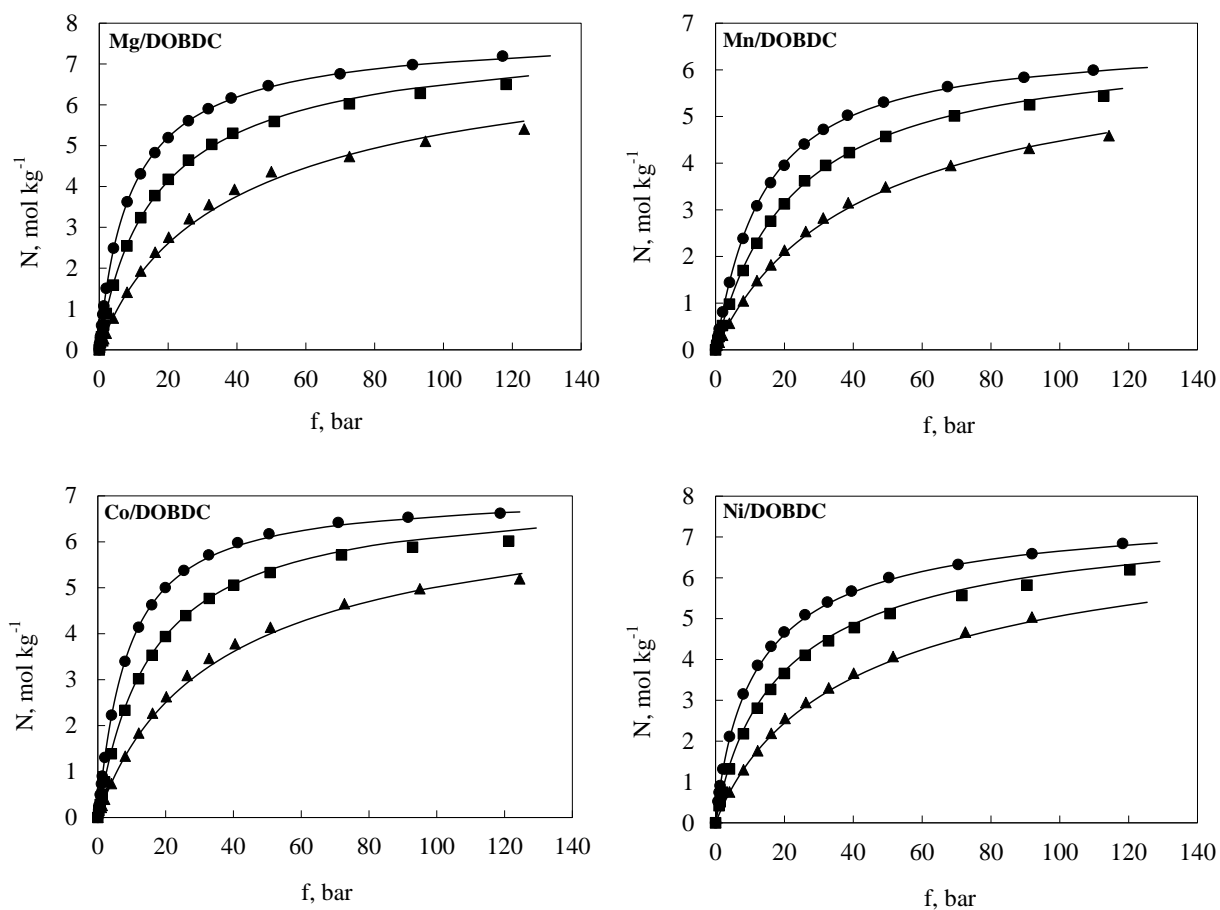

**Figure S9.**  $\text{N}_2$  isotherms. Symbols are experimental data at 294 K (●), 315 K (■) and 352 K (▲); lines are fits obtained using Langmuir-virial isotherm parameters from Tables S5.

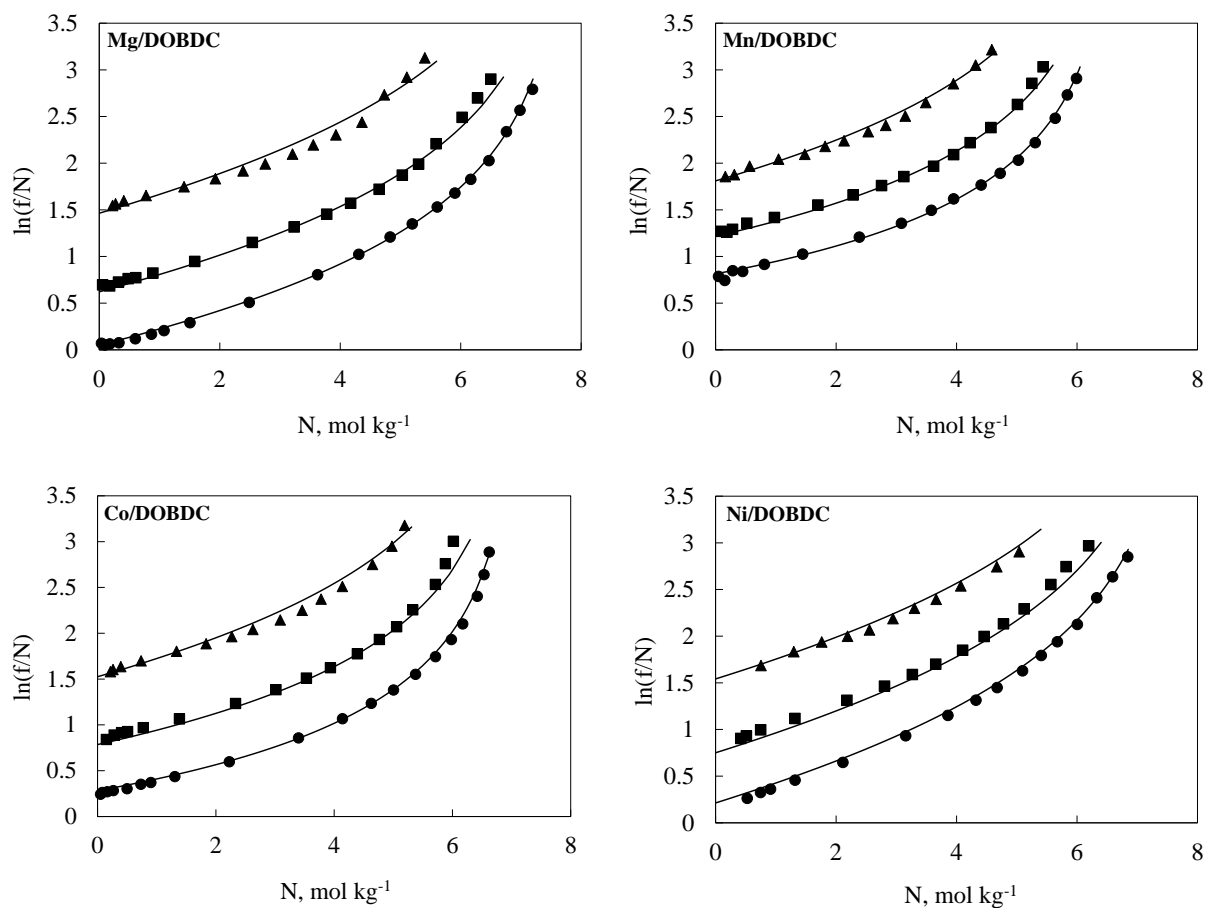

**Figure S10.**  $\text{N}_2$  isotherms in virial domain. Symbols are experimental data at 294 K (●), 315 K (■) and 352 K (▲); lines are fits obtained using Langmuir-virial isotherm parameters from Tables S5.

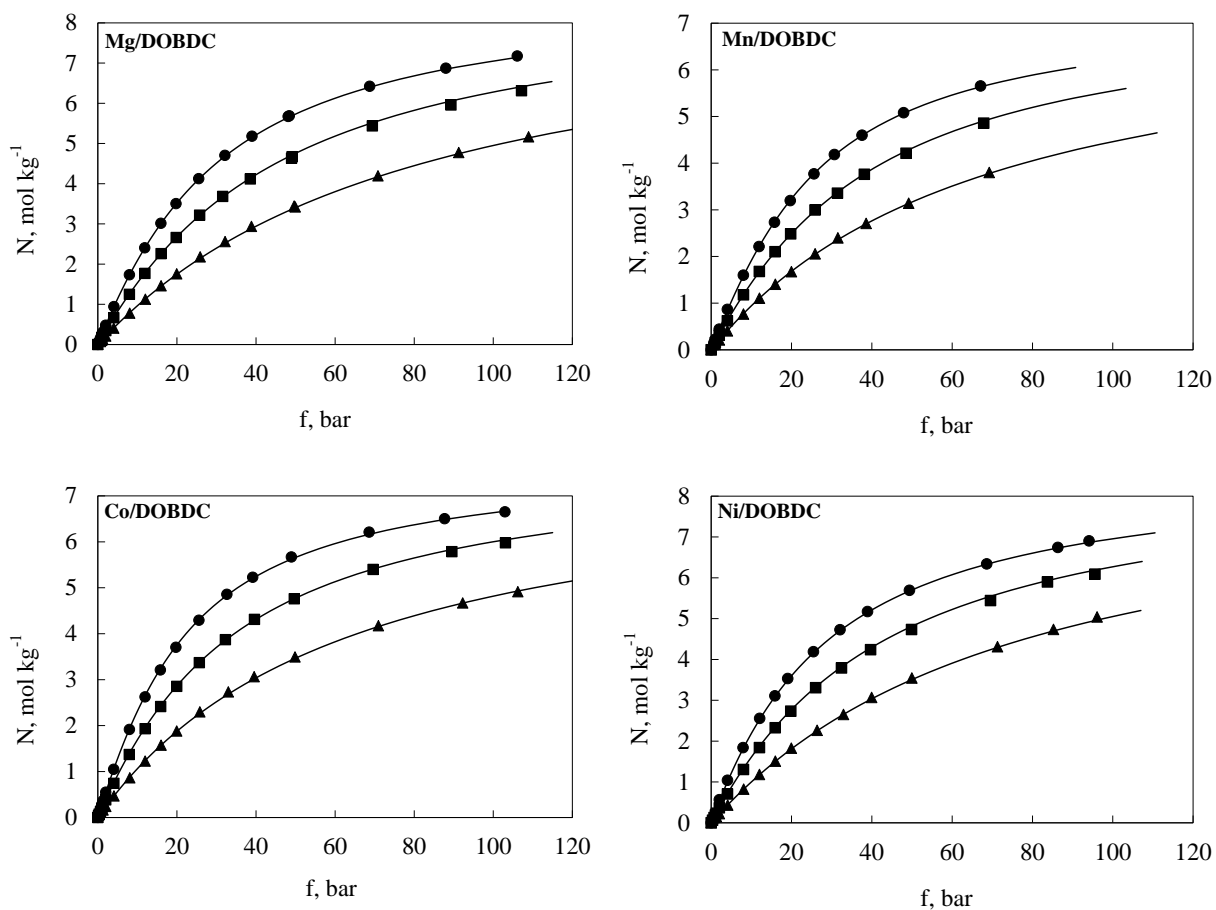

**Figure S11.** Ar isotherms. Symbols are experimental data at 294 K (●), 315 K (■) and 352 K (▲); lines are fits obtained using Langmuir-virial isotherm parameters from Tables S6.

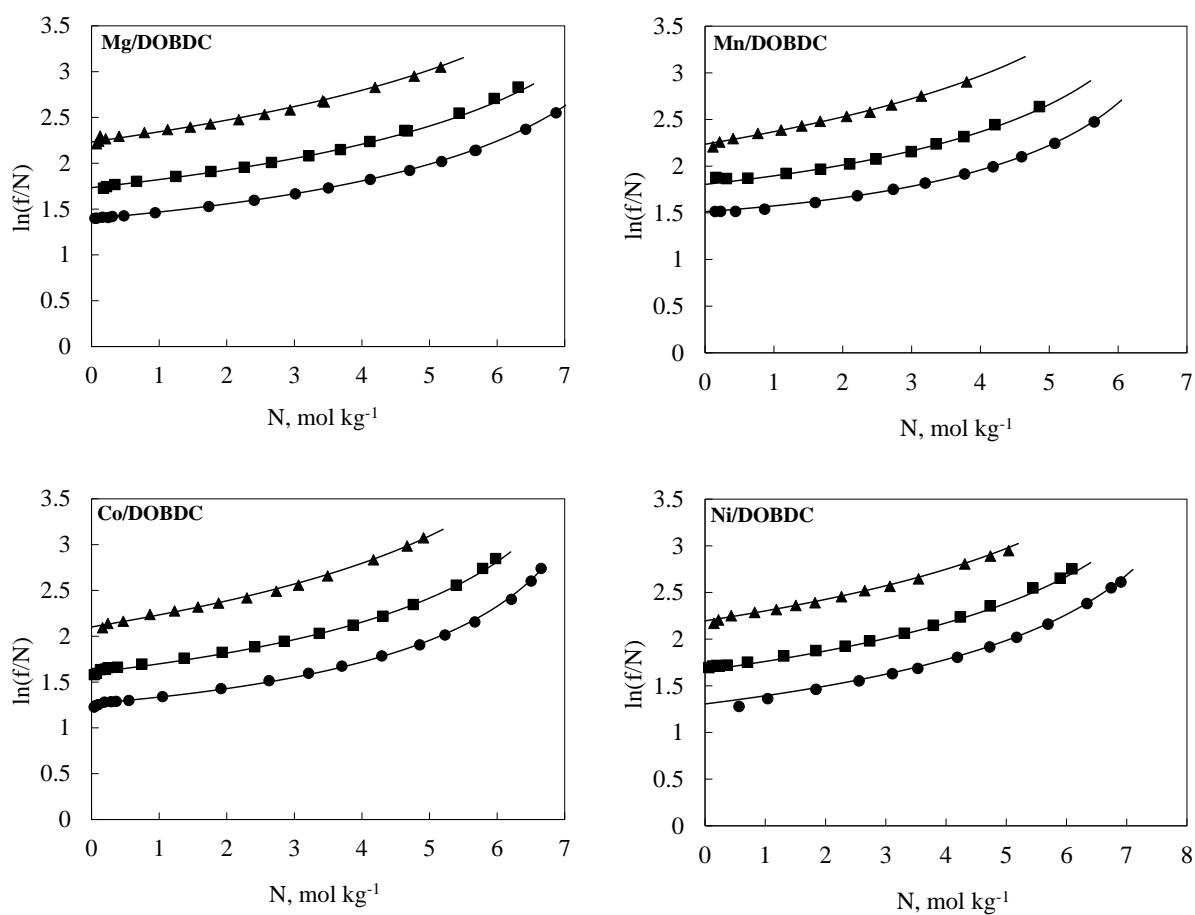

**Figure S12.** Ar isotherms in virial domain. Symbols are experimental data at 294 K (●), 315 K (■) and 352 K (▲); lines are fits obtained using Langmuir-virial isotherm parameters from Tables S6.

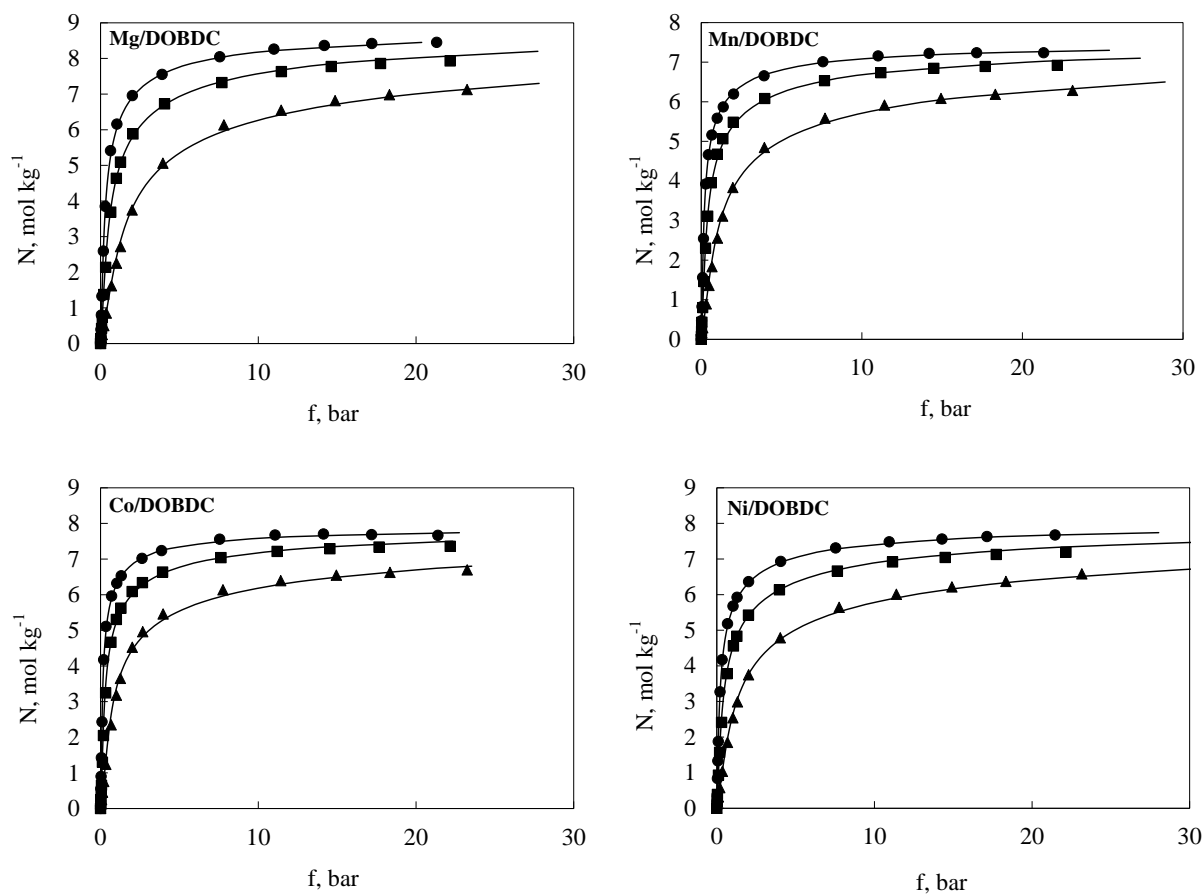

**Figure S13.**  $C_2H_6$  isotherms. Symbols are experimental data at 294 K (●), 315 K (■) and 352 K (▲); lines are fits obtained using Langmuir-virial isotherm parameters from Tables S7.

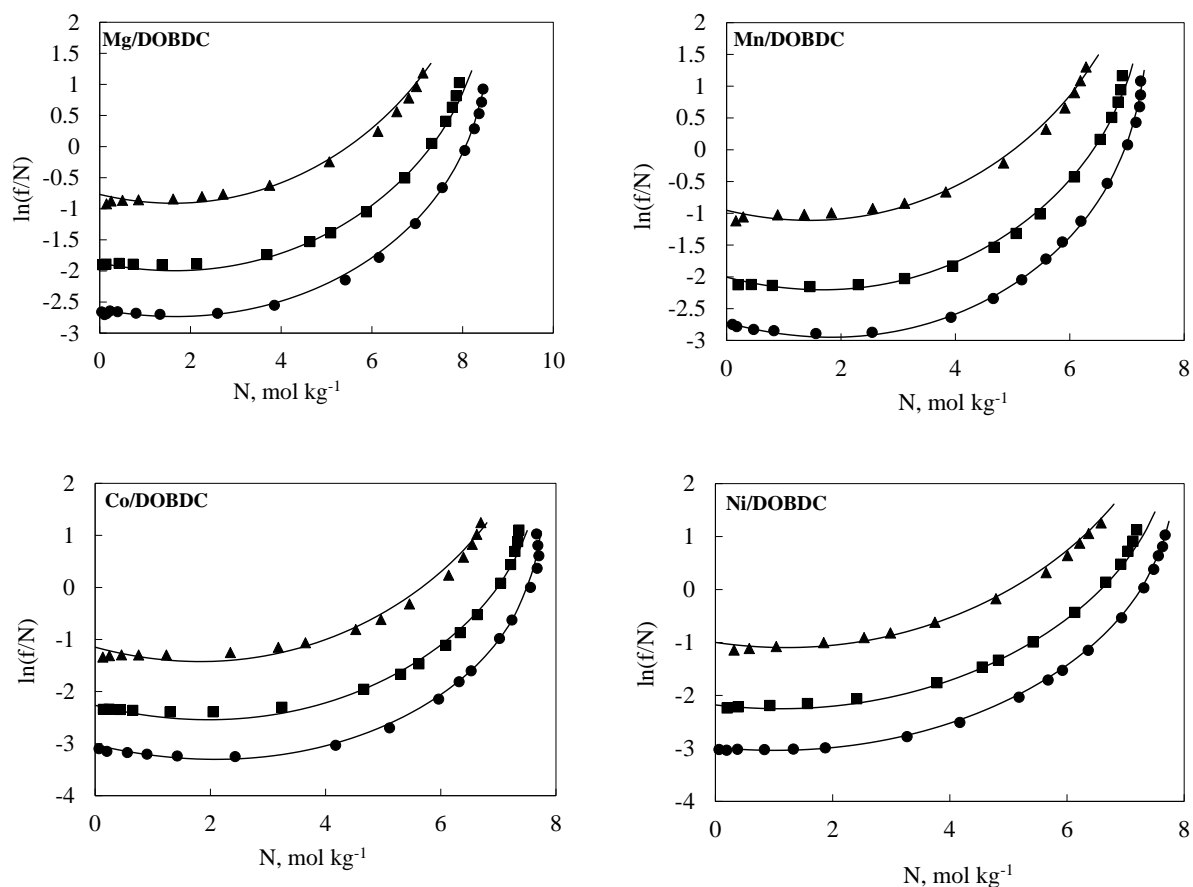

**Figure S14.**  $\text{C}_2\text{H}_6$  isotherms in virial domain. Symbols are experimental data at 294 K (●), 315 K (■) and 352 K (▲); lines are fits obtained using Langmuir-virial isotherm parameters from Tables S7.

### Variation of Henry's constants ( $\beta$ ) and adsorption enthalpy with polarizability

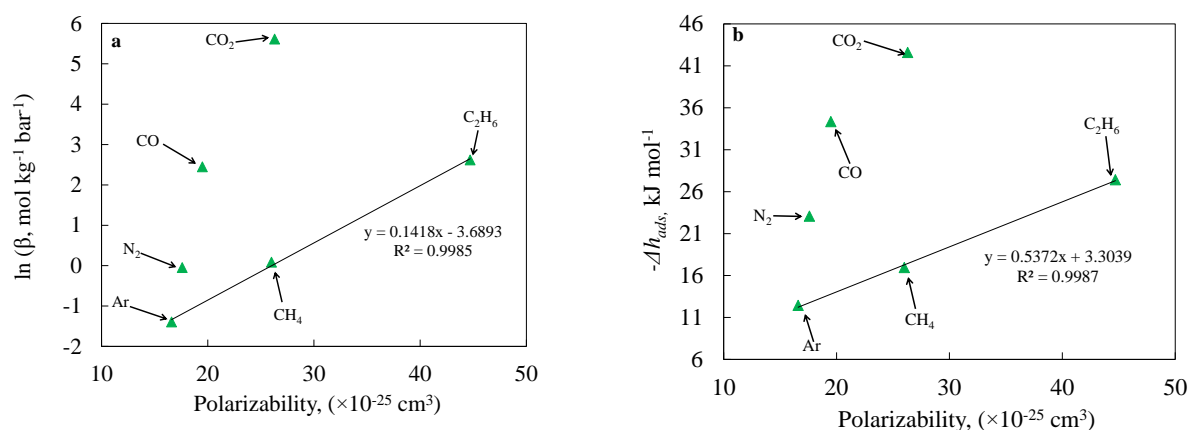

**Figure S15.** Henry's constant at 294 K (a) and enthalpy of adsorption at zero occupancy (b) as a function of polarizability of the adsorbate for Mg/DOBDC adsorbent; linear trend lines for non-polar adsorbates are also shown.

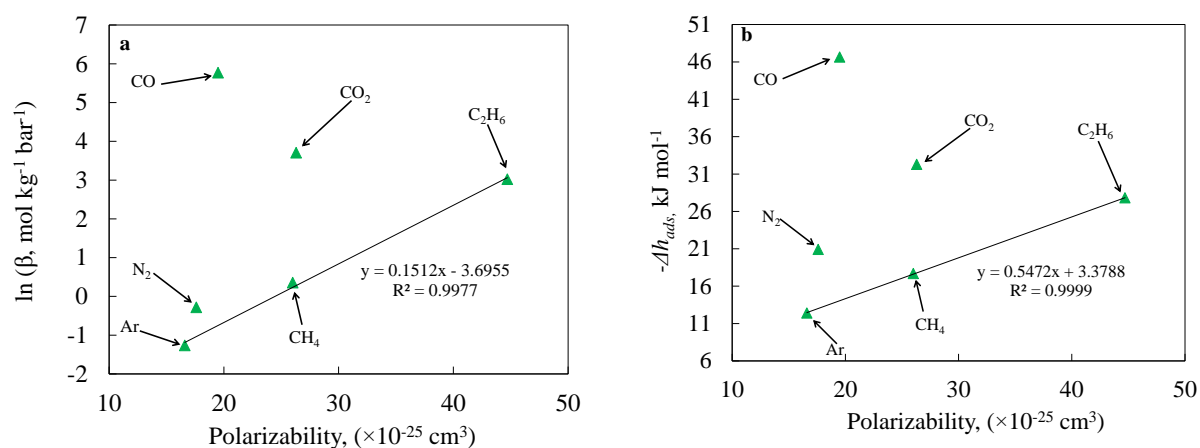

**Figure S16.** Henry's constant at 294 K (a) and enthalpy of adsorption at zero occupancy (b) as a function of polarizability of the adsorbate for Co/DOBDC adsorbent; linear trend lines for non-polar adsorbates are also shown.

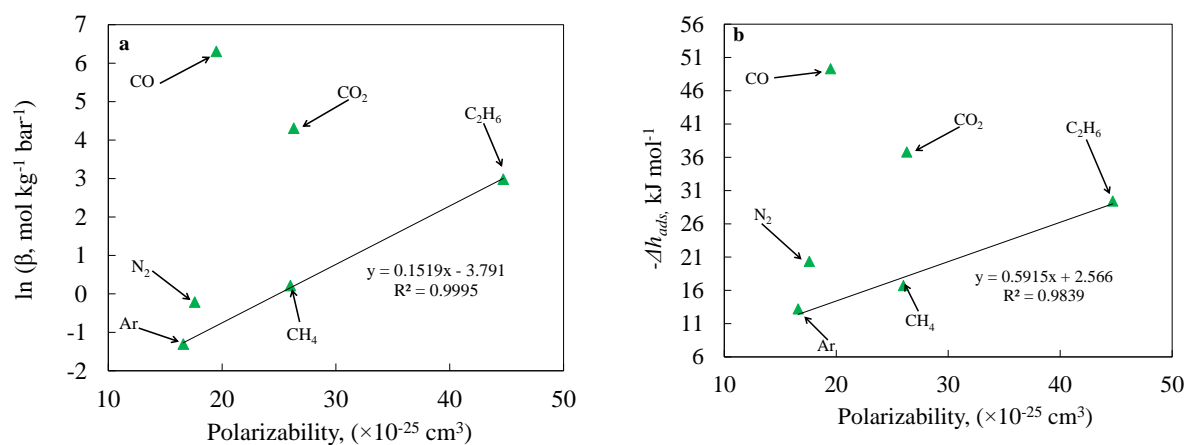

**Figure S17.** Henry's constant at 294 K **(a)** and enthalpy of adsorption at zero occupancy **(b)** as a function of polarizability of the adsorbate for Ni/DOBDC adsorbent; linear trend lines for non-polar adsorbates are also shown.

## Comparison of isotherms of different M/DOBDC samples

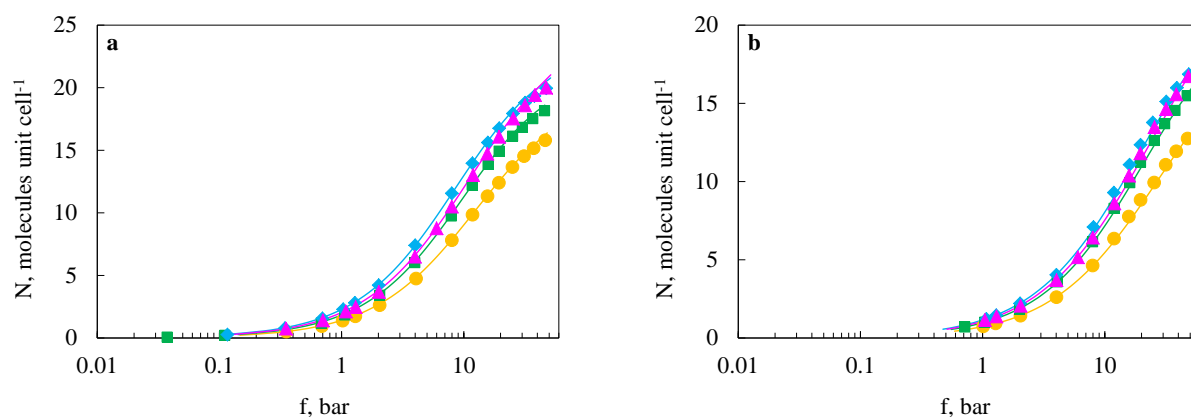

**Figure S18.**  $\text{CH}_4$  isotherms at 315 K (a) and 352 K (b) on Mg/DOBDC (●), Mn/DOBDC (■), Co/DOBDC (◆) and Ni/DOBDC (▲); symbols are experimental data and lines are fits obtained using Langmuir-virial model parameters from Table S4 in supporting information.

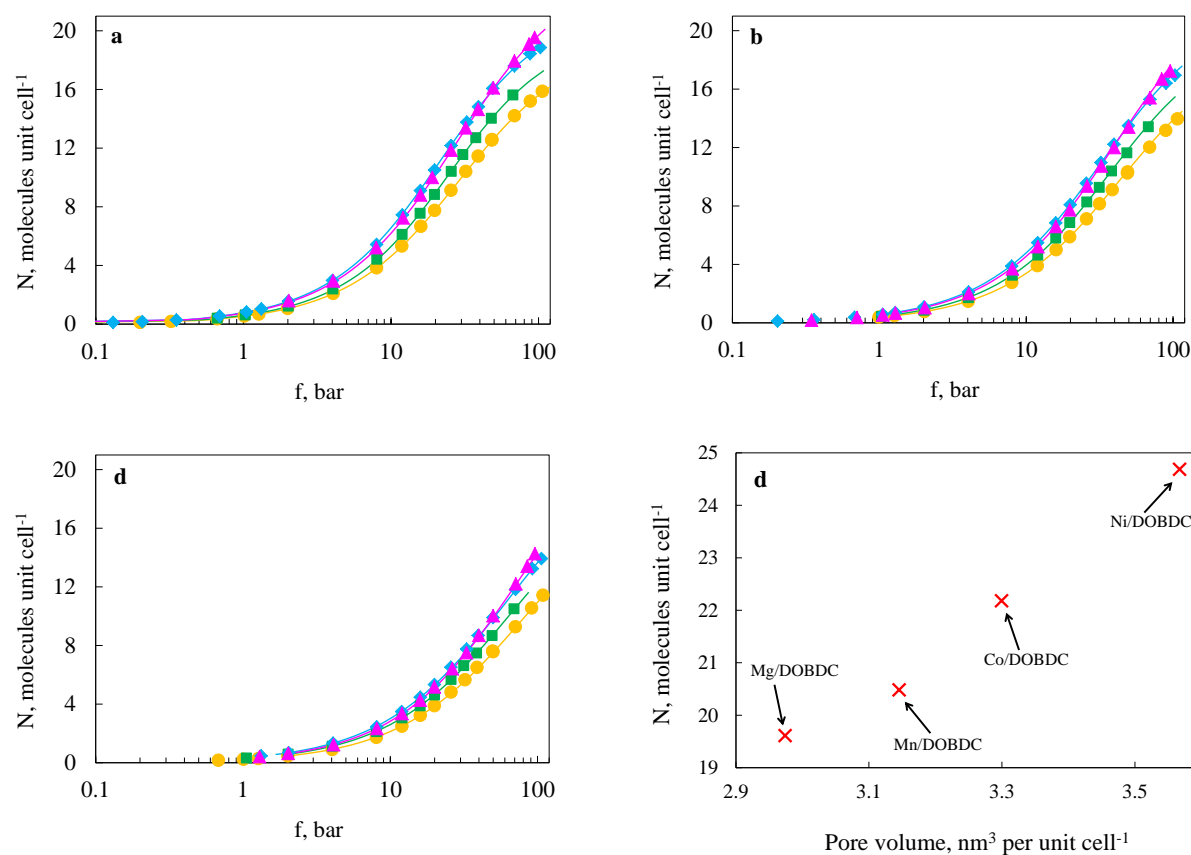

**Figure S19.**  $\text{Ar}$  isotherms at 294 K (a), 315 K (b), and 352 K (c) on Mg/DOBDC (●), Mn/DOBDC (■), Co/DOBDC (◆) and Ni/DOBDC (▲). Symbols are experimental data and lines are fits obtained using Langmuir-virial model parameters from Table S6 in supporting information. (d) Variation of saturation uptake with pore volume.

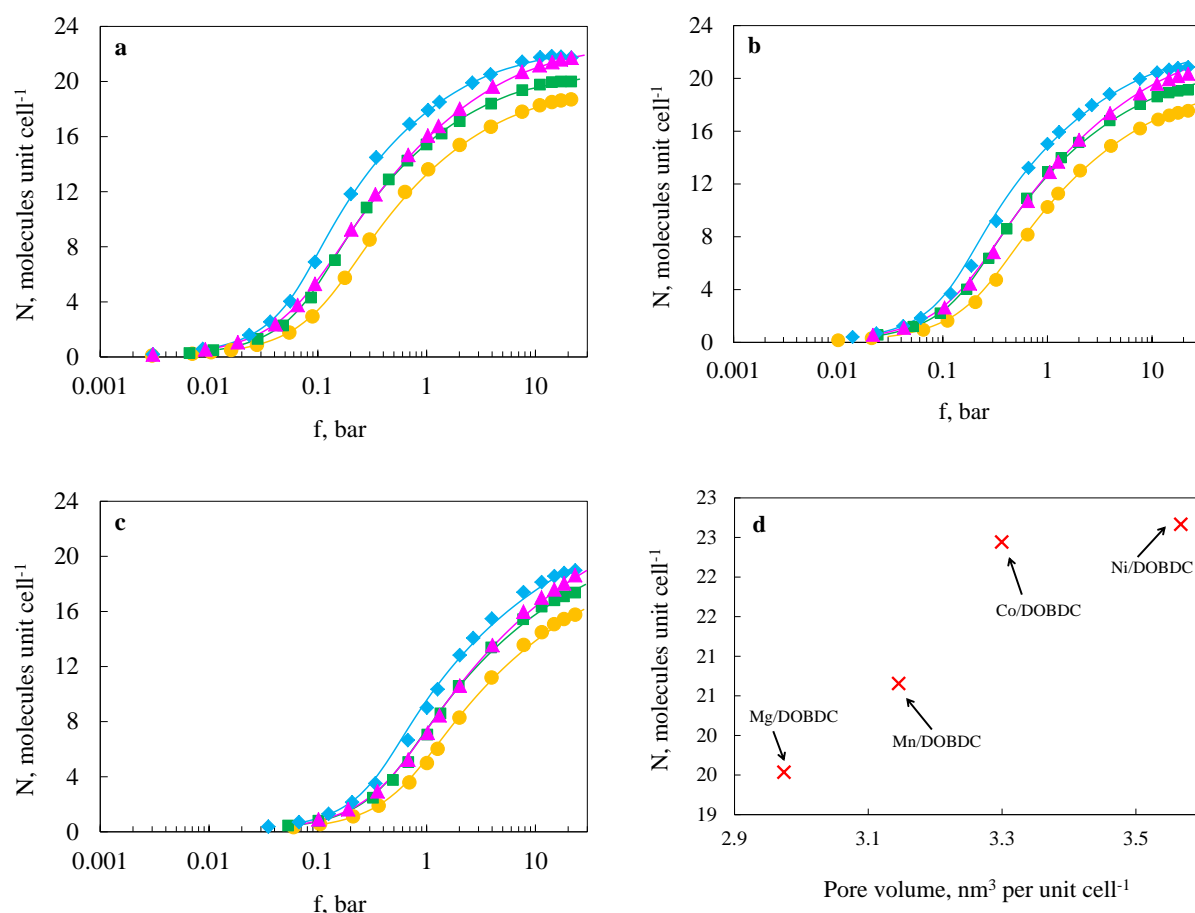

**Figure S20.**  $C_2H_6$  isotherms at 294 K (a), 315 K (b), and 352 K (c) on Mg/DOBDC (●), Mn/DOBDC (■), Co/DOBDC (◆) and Ni/DOBDC (▲). Symbols are experimental data and lines are fits obtained using Langmuir-virial model parameters from Table S7 in supporting information. (b) Variation of saturation uptake with pore volume.

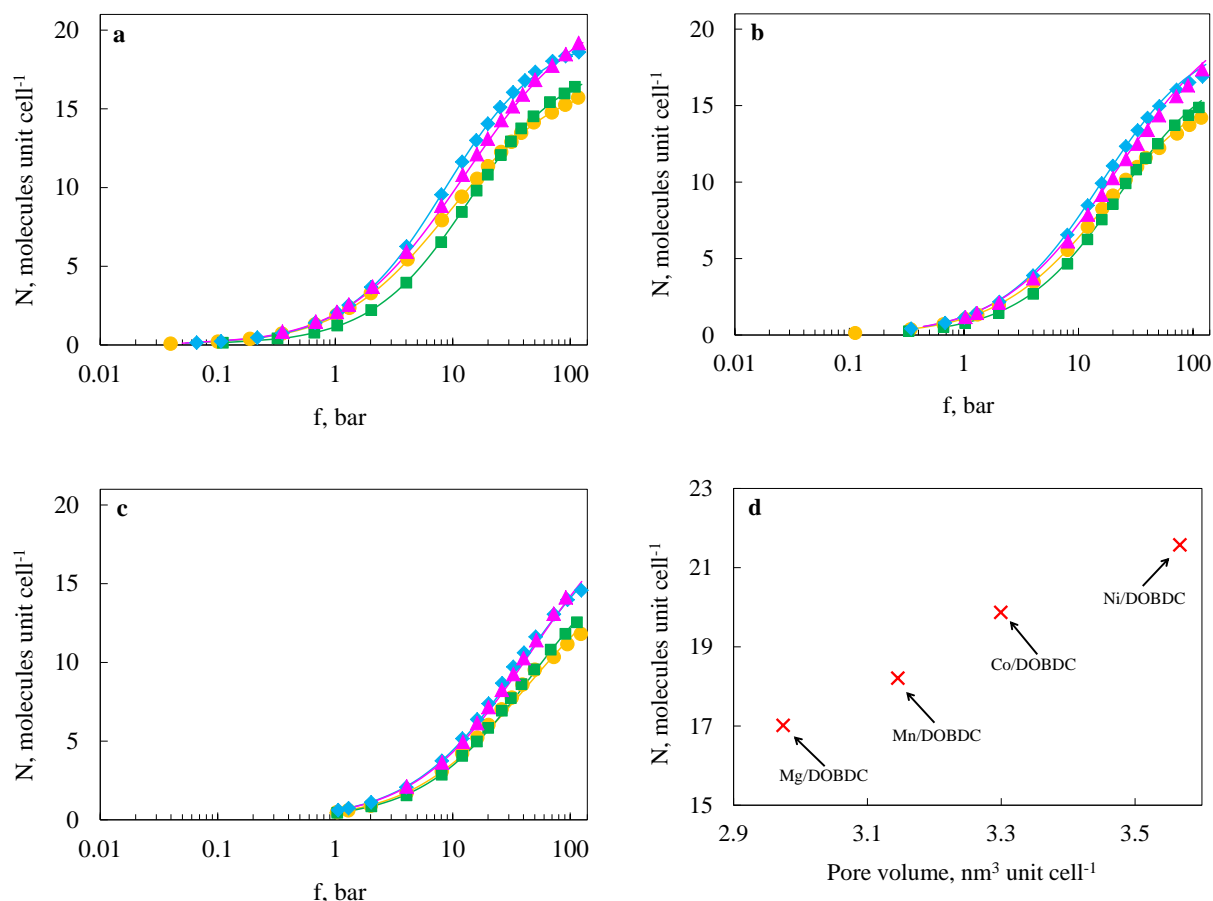

**Figure S21.**  $N_2$  isotherms at 294 K (a), 315 K (b), and 352 K (c) on Mg/DOBDC (●), Mn/DOBDC (■), Co/DOBDC (◆) and Ni/DOBDC (▲). Symbols are experimental data and lines are fits obtained using Langmuir-virial model parameters from Table S5 in supporting information. (d) Variation of saturation uptake with pore volume.

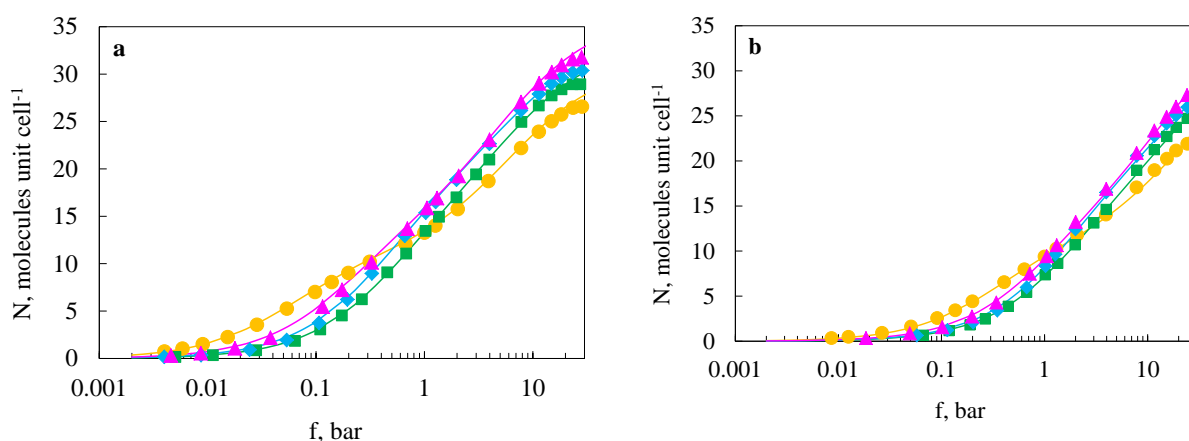

**Figure S22.**  $CO_2$  isotherms at 315 K (a) and 352 K (b) on Mg/DOBDC (●), Mn/DOBDC (■), Co/DOBDC (◆) and Ni/DOBDC (▲); symbols are experimental data and lines are fits obtained using DSL model parameters from Table S2 in supporting information.

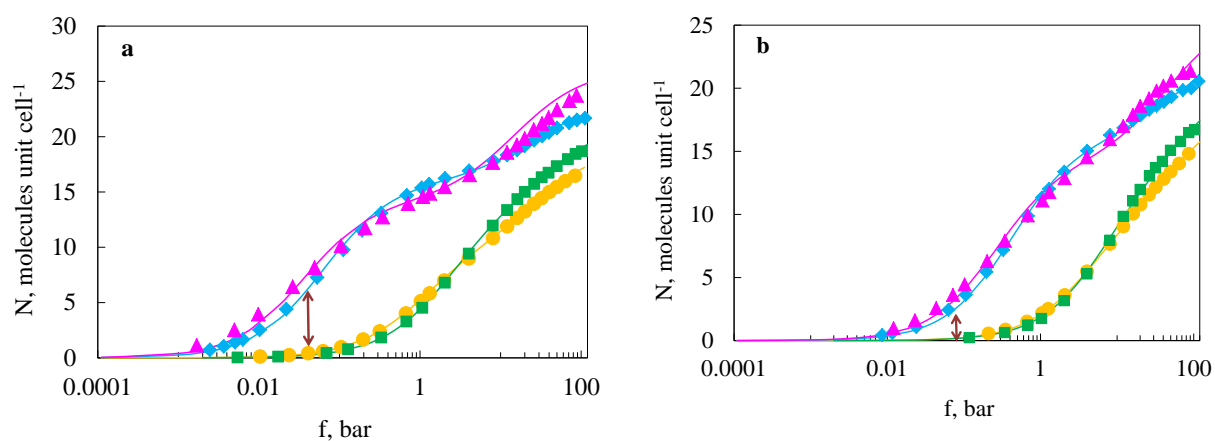

**Figure S23.** CO isotherms at 315 K (a) and 352 K (b) on Mg/DOBDC (●), Mn/DOBDC (■), Co/DOBDC (◆) and Ni/DOBDC (▲); symbols are experimental data and lines are fits obtained using DSL model parameters from table S3 in supporting information.

## Fit parameters

**Table S2.** Fit parameters of dual site Langmuir (DSL) isotherm of CO<sub>2</sub>

| parameters                                      | Mg/DOBDC | Mn/DOBDC | Co/DOBDC | Ni/DOBDC |
|-------------------------------------------------|----------|----------|----------|----------|
| $N_1^{max}$ , mol kg <sup>-1</sup>              | 5.19     | 6.18     | 7.00     | 5.39     |
| $N_2^{max}$ , mol kg <sup>-1</sup>              | 9.07     | 6.06     | 5.42     | 7.53     |
| $\beta_1^{(0)} \times 10^5$ , bar <sup>-1</sup> | 0.132    | 3.520    | 0.964    | 0.322    |
| $\beta_1^{(1)}$ , K                             | 5142.6   | 3436.8   | 3901.3   | 4477.6   |
| $\beta_2^{(0)} \times 10^5$ , bar <sup>-1</sup> | 0.239    | 0.323    | 0.248    | 0.805    |
| $\beta_2^{(1)}$ , K                             | 3508.2   | 3385.6   | 3424.8   | 3163.0   |

**Table S3.** Fit parameters of dual site Langmuir (DSL) isotherm of CO

| parameters                                      | Mg/DOBDC | Mn/DOBDC | Co/DOBDC | Ni/DOBDC |
|-------------------------------------------------|----------|----------|----------|----------|
| $N_1^{max}$ , mol kg <sup>-1</sup>              | 4.68     | 5.13     | 5.70     | 5.08     |
| $N_2^{max}$ , mol kg <sup>-1</sup>              | 4.17     | 2.74     | 2.61     | 4.25     |
| $\beta_1^{(0)} \times 10^5$ , bar <sup>-1</sup> | 0.169    | 1.431    | 0.029    | 0.019    |
| $\beta_1^{(1)}$ , K                             | 4167.6   | 3247.5   | 5611.5   | 5932.0   |
| $\beta_2^{(0)} \times 10^5$ , bar <sup>-1</sup> | 2.502    | 0.987    | 1.108    | 0.116    |
| $\beta_2^{(1)}$ , K                             | 2253.7   | 2447.4   | 2581.5   | 3453.2   |

**Table S4.** Fit parameters of Langmuir-virial isotherm of CH<sub>4</sub>

| parameters                                                      | Mg/DOBDC | Mn/DOBDC | Co/DOBDC | Ni/DOBDC |
|-----------------------------------------------------------------|----------|----------|----------|----------|
| $\beta^{(0)} \times 10^3, \text{ mol kg}^{-1} \text{ bar}^{-1}$ | 1.06     | 1.4      | 1.02     | 1.32     |
| $\beta^{(1)}, \text{ K}$                                        | 2039.2   | 1962.2   | 2127.2   | 2010.8   |
| $b^{(0)}, \text{ mol}^{-1} \text{ kg}$                          | 0.229    | 0.176    | 0.259    | 0.241    |
| $b^{(1)}, \text{ mol}^{-1} \text{ kg K}$                        | -78.0    | -68.2    | -91.1    | -78.3    |
| $N^{max}, \text{ mol kg}^{-1}$                                  | 9.33     | 8.07     | 8.52     | 9.10     |

**Table S5.** Fit parameters of Langmuir-virial isotherm of N<sub>2</sub>

| parameters                                                      | Mg/DOBDC | Mn/DOBDC | Co/DOBDC | Ni/DOBDC |
|-----------------------------------------------------------------|----------|----------|----------|----------|
| $\beta^{(0)} \times 10^3, \text{ mol kg}^{-1} \text{ bar}^{-1}$ | 0.18     | 1.05     | 0.40     | 0.25     |
| $\beta^{(1)}, \text{ K}$                                        | 2524.2   | 1776.9   | 2218.5   | 2371     |
| $b^{(0)}, \text{ mol}^{-1} \text{ kg}$                          | 0.199    | 0.393    | 0.405    | 0.066    |
| $b^{(1)}, \text{ mol}^{-1} \text{ kg K}$                        | -47.4    | -124.3   | -126.3   | 2.5      |
| $N^{max}, \text{ mol kg}^{-1}$                                  | 7.79     | 6.66     | 7.08     | 7.70     |

**Table S6.** Fit parameters of Langmuir-virial isotherm of Ar

| parameters                                                      | Mg/DOBDC | Mn/DOBDC | Co/DOBDC | Ni/DOBDC |
|-----------------------------------------------------------------|----------|----------|----------|----------|
| $\beta^{(0)} \times 10^3, \text{ mol kg}^{-1} \text{ bar}^{-1}$ | 1.53     | 2.74     | 1.76     | 1.22     |
| $\beta^{(1)}, \text{ K}$                                        | 1495.2   | 1290.2   | 1292.5   | 1587.9   |
| $b^{(0)}, \text{ mol}^{-1} \text{ kg}$                          | 0.183    | 0.353    | 0.301    | 0.082    |
| $b^{(1)}, \text{ mol}^{-1} \text{ kg K}$                        | -67.6    | -127.8   | -107.9   | -34.3    |
| $N^{max}, \text{ mol kg}^{-1}$                                  | 8.87     | 7.41     | 7.82     | 8.72     |

**Table S7.** Fit parameters of Langmuir-virial isotherm of C<sub>2</sub>H<sub>6</sub>

| parameters                                                      | Mg/DOBDC | Mn/DOBDC | Co/DOBDC | Ni/DOBDC |
|-----------------------------------------------------------------|----------|----------|----------|----------|
| $\beta^{(0)} \times 10^3, \text{ mol kg}^{-1} \text{ bar}^{-1}$ | 0.183    | 0.335    | 0.235    | 0.117    |
| $\beta^{(1)}, \text{ K}$                                        | 3298.2   | 3152.0   | 3345.2   | 3538.4   |
| $b^{(0)}, \text{ mol}^{-1} \text{ kg}$                          | -0.472   | -0.189   | -0.608   | -0.557   |
| $b^{(1)}, \text{ mol}^{-1} \text{ kg K}$                        | 65.1     | -56.7    | 64.0     | 95.7     |
| $c^{(0)}, \text{ mol}^{-2} \text{ kg}^2$                        | 0.109    | 0.102    | 0.170    | 0.128    |
| $c^{(1)}, \text{ mol}^{-2} \text{ kg}^2 \text{ K}$              | -22.4    | -13.5    | -34.6    | -25.1    |
| $N^{max}, \text{ mol kg}^{-1}$                                  | 8.79     | 7.47     | 7.88     | 7.98     |

## Enthalpy of adsorption

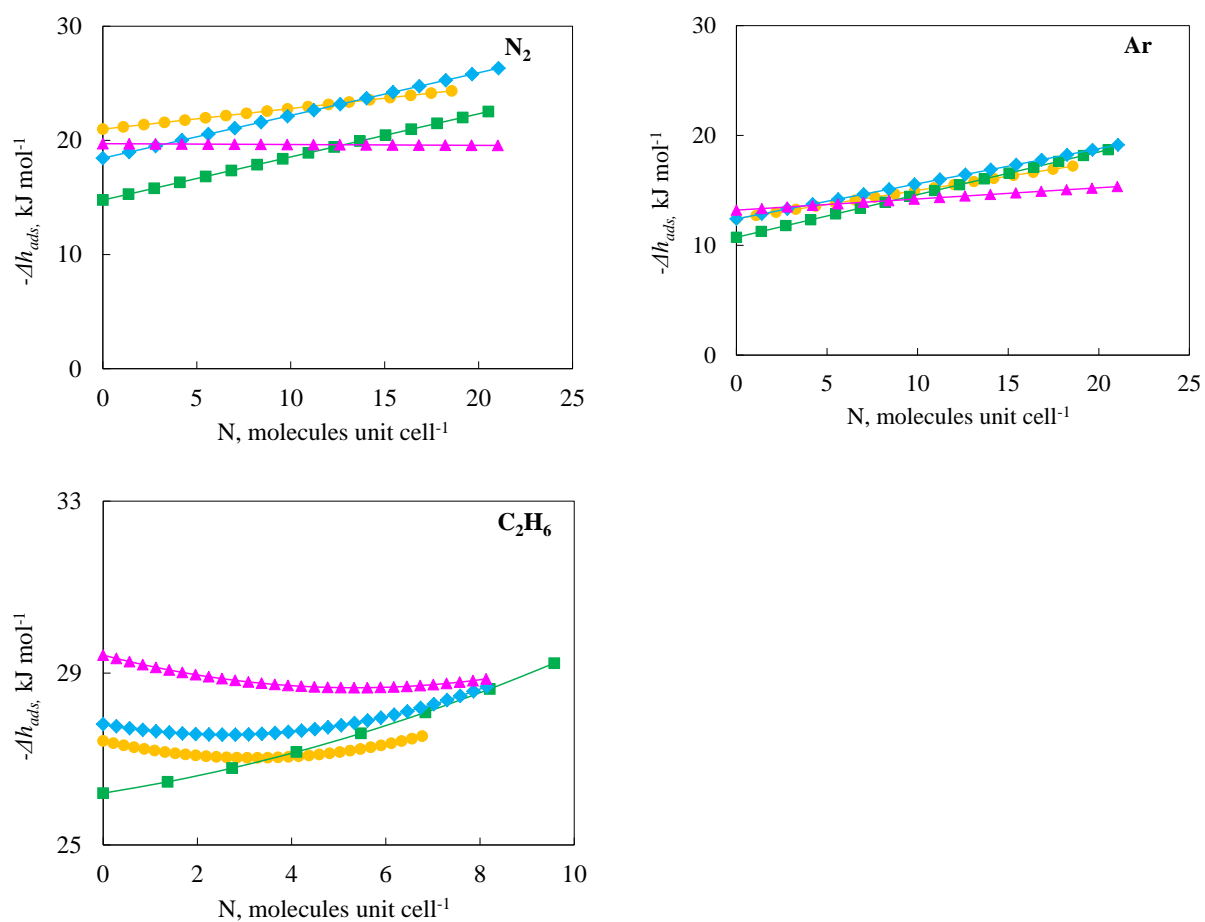

**Figure S24.** Variation of adsorption enthalpy of with loading for Mg/DOBDC (●), Mn/DOBDC (■), Co/DOBDC (◆) and Ni/DOBDC.

### IAST predictions for selectivities at various conditions

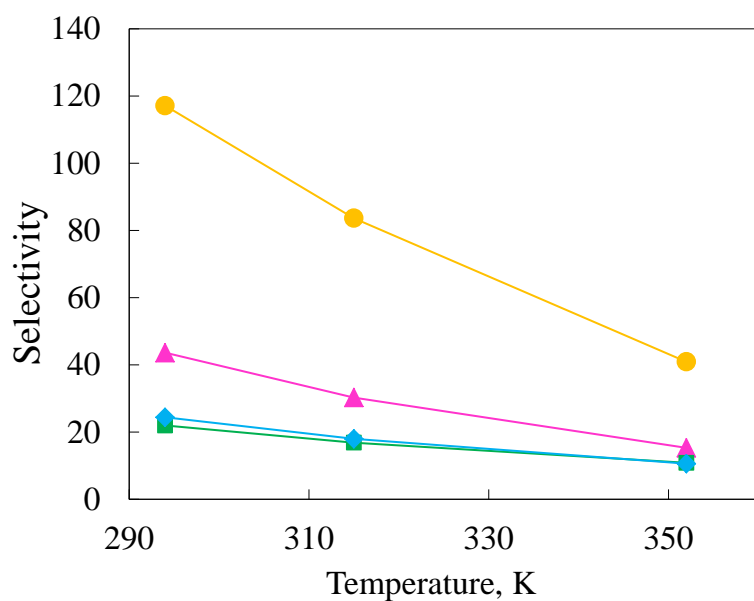

**Figure S25.** Effect of temperature on CO<sub>2</sub> selectivity (for 20% molar composition of CO<sub>2</sub>) over CH<sub>4</sub> at 1 bar total pressure for Mg/DOBDC (●), Mn/DOBDC (■), Co/DOBDC (◆) and Ni/DOBDC (▲). Symbols are calculated values; lines are drawn as a guide to the eyes.

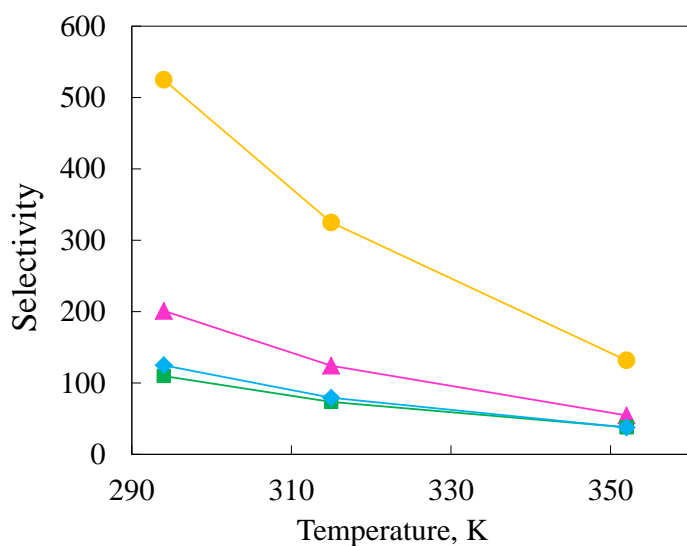

**Figure S26.** Effect of temperature on CO<sub>2</sub> selectivity (for 20% molar composition of CO<sub>2</sub>) over Ar at 1 bar total pressure for Mg/DOBDC (●), Mn/DOBDC (■), Co/DOBDC (◆) and Ni/DOBDC (▲). Symbols are calculated values; lines are drawn as a guide to the eyes.

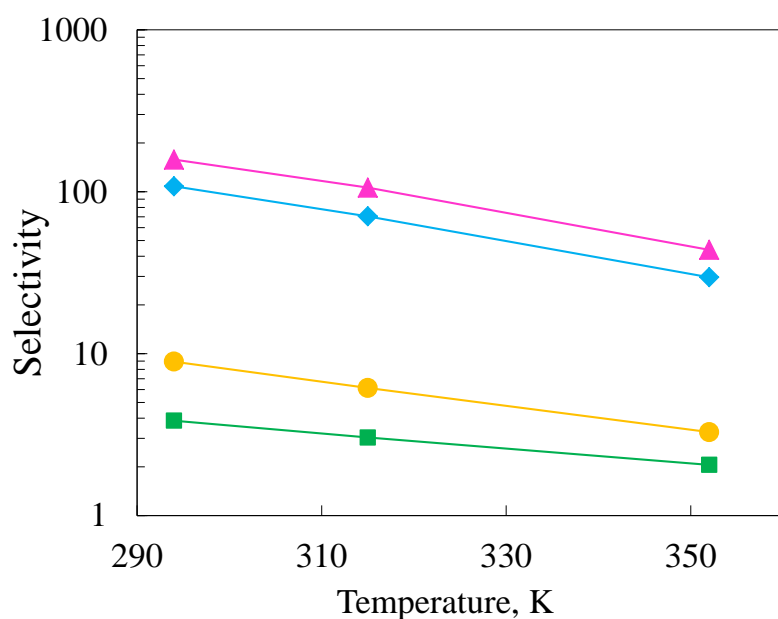

**Figure S27.** Effect of temperature on CO selectivity (for 20% molar composition of CO) over  $\text{CH}_4$  at 1 bar total pressure for Mg/DOBDC (●), Mn/DOBDC (■), Co/DOBDC (◆) and Ni/DOBDC (▲). Symbols are calculated values; lines are drawn as a guide to the eyes.

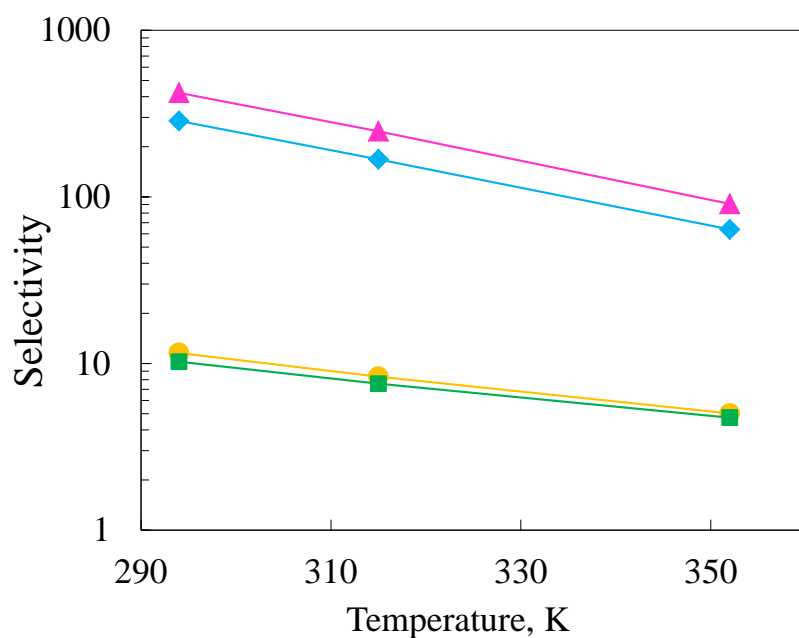

**Figure S28.** Effect of temperature on CO selectivity (for 20% molar composition of CO) over  $\text{N}_2$  at 1 bar total pressure for Mg/DOBDC (●), Mn/DOBDC (■), Co/DOBDC (◆) and Ni/DOBDC (▲). Symbols are calculated values; lines are drawn as a guide to the eyes.

## References

- (1) Caskey, S. R.; Wong-Foy, A. G.; Matzger, A. J. Dramatic Tuning of Carbon Dioxide Uptake via Metal Substitution in a Coordination Polymer with Cylindrical Pores. *J. Am. Chem. Soc.* **2008**, *130*, 10870–10871.
- (2) Zhou, W.; Wu, H.; Yildirim, T. Enhanced H<sub>2</sub> Adsorption in Isostructural Metal Organic Frameworks with Open Metal Sites: Strong Dependence of the Binding Strength on Metal Ions. *J. Am. Chem. Soc.* **2008**, *130*, 15268–15269.
- (3) Dietzel, P. D. C.; Besikiotis, V.; Blom, R. Application of metal–organic frameworks with coordinatively unsaturated metal sites in storage and separation of methane and carbon dioxide. *J. Mater. Chem.* **2009**, *19*, 7362–7370.
